1 Autoregulation of the *S. mutans* SloR metalloregulator is constitutive and driven by an  
2 independent promoter.

3

4 Patrick Monette<sup>a</sup>, Richard Brach<sup>a</sup>, Annie Cowan<sup>a</sup>, Roger Winters<sup>a</sup>, Jazz Weisman<sup>b</sup>, Foster  
5 Seybert<sup>b</sup>, Kelsey Goguen<sup>a</sup>, James Chen<sup>c</sup>, Arthur Glasfeld<sup>b</sup>, and Grace Spatafora<sup>a#</sup>

6

7 <sup>a</sup>Program in Molecular Biology & Biochemistry, Department of Biology, Middlebury College,  
8 Middlebury, VT

9 <sup>b</sup>Department of Biochemistry & Molecular Biology, Oregon Health Science University,  
10 Portland, Oregon

11 <sup>c</sup> Department of Chemistry, Reed College, Portland, Oregon

12

13 Running Head: *S. mutans* SloR autoregulation

14 #Address correspondence to Grace Spatafora, [spatafor@middlebury.edu](mailto:spatafor@middlebury.edu)

15 P.M. and R.B. contributed equally to this work.

16

17 **Abstract**

18 *Streptococcus mutans*, one of ~600 bacterial species in the human oral cavity, is among the most  
19 acidogenic constituents of the plaque biofilm. Considered to be the primary causative agent of  
20 dental caries, *S. mutans* harbors a 25kDa SloR metalloregulatory protein which controls metal ion  
21 transport across the bacterial cell membrane to maintain essential metal ion homeostasis. The  
22 expression of SloR derives, in part, from transcriptional readthrough of the *sloABC* operon which  
23 encodes a Mn<sup>2+</sup>/Fe<sup>2+</sup> ABC transport system. Herein, we describe the details of the *sloABC*  
24 promoter that drives this transcription, as well as a novel independent promoter in an intergenic  
25 region (IGR) that contributes to downstream *sloR* expression. RT-PCR studies support *sloR*  
26 transcription that is independent of *sloABC* expression, and the results of 5' RACE revealed a *sloR*  
27 transcription start site in the IGR from which the -10 and -35 promoter regions were predicted.  
28 The results of gel mobility shift assays support direct SloR binding to the IGR, albeit with lower  
29 affinity than SloR binding to the *sloABCR* promoter. Function of the *sloR* promoter was validated  
30 in qRT-PCR experiments. Interestingly, *sloR* expression was not significantly impacted when  
31 grown in the presence of high manganese, whereas expression of the *sloABC* operon was repressed  
32 under these conditions. The results of *in vitro* transcription studies support SloR-mediated  
33 transcriptional-activation of *sloR* and -repression of *sloABC*. Taken together, these findings  
34 implicate SloR as a bifunctional regulator that represses *sloABC* promoter activity and encourages  
35 *sloR* transcription from an independent promoter.

36

37 **Importance:** Tooth decay is a ubiquitous infectious disease that is especially pervasive in  
38 underserved communities worldwide. *S. mutans*-induced carious lesions cause functional,  
39 physical, and/or aesthetic impairment in the vast majority of adults, and in 60-90% of

40 schoolchildren in industrialized countries. Billions of dollars are spent annually on caries  
41 treatment, and productivity losses due to absenteeism from the workplace are significant. Research  
42 aimed at alleviating *S. mutans*-induced tooth decay is important because it can address the  
43 socioeconomic disparity that is associated with dental cavities and improve overall general health  
44 which is inextricably linked to oral health. Research focused on the *S. mutans* SloR  
45 metalloregulatory protein can guide the development of novel therapeutics and so alleviate the  
46 burden of dental cavities.

47

48

## 49 Introduction

50 Dental caries are important indicators of oral health and overall general health in both  
51 children and adults. Despite significant public health efforts aimed at reducing caries incidence,  
52 approximately 60-90% of school-age children worldwide experience caries, with 91% of adult  
53 caries in the United States involving the permanent dentition (1, 2). Of particular concern are  
54 children of socioeconomically disadvantaged families who are twice as likely to experience  
55 rampant caries in comparison with their wealthier counterparts, and who often present with severe  
56 clinical outcomes later in life (3).

57  
58 Among the early colonizers of the tooth surface is *Streptococcus mutans*, considered to be the  
59 primary causative agent of dental cavities in humans (4). Ongoing research aimed at alleviating or  
60 eliminating caries has given rise to valuable insights of *S. mutans* virulence properties, including  
61 genes that mediate its obligate biofilm lifestyle, its ability to tolerate acid and oxidative stress, and  
62 maintain metal ion homeostasis (5–12). The introduction of sucrose into the Western diet marked  
63 a turning point for *S. mutans*, which metabolizes carbohydrates for energy production and  
64 generates a lactic acid byproduct that demineralizes tooth enamel and drives the process of tooth  
65 decay (13, 14). Taken together, *S. mutans*' arsenal of virulence attributes makes it an especially  
66 resolute dental pathogen, and in dysbiotic plaque a primary instigator of caries formation (15, 16).

67  
68 Among the evolutionary responses that are paramount for *S. mutans* survival and pathogenesis in  
69 dental plaque is tight regulation of essential metal ion transport across the bacterial cell membrane.  
70 To this end, *S. mutans* is endowed with metal ion uptake machinery which enables the import of  
71 divalent cations such as  $Mn^{2+}$  and  $Fe^{2+}$  that are essential for cellular and subcellular functions, and

72 ultimately for bacterial cell viability. Aberrant metal ion uptake, however, can result in over-  
73 accumulation of intracellular metal ions and bacterial cell death owing to Fenton chemistry and  
74 the elaboration of toxic oxygen radicals (17–20). To counteract these deleterious effects and  
75 achieve intracellular homeostasis, *S. mutans* has evolved transport mechanisms that function to  
76 maintain appropriate metal ion uptake, which is especially paramount during periods of feast and  
77 famine in the oral cavity when  $Mn^{2+}$  concentrations can vary greatly.

78

79 *S. mutans* metal ion uptake is mediated, in large part, by the *sloABCR* operon which encodes a  
80 SloABC  $Mn^{2+}/Fe^{2+}$  transporter and, via transcriptional readthrough, a 25 kDa SloR  
81 metalloregulatory protein. As a transcription factor, SloR, modulates metal ion transport upon  
82 binding to DNA in response to manganese availability (7, 20, 21). For instance, between  
83 mealtimes exogenous metal ions are not readily available because they are sequestered to host  
84 proteins, such as lactoferrin in saliva. Hence, under fasting conditions, *S. mutans* upregulates the  
85 *sloABC* gene products which includes ATP- binding and -hydrolyzing proteins as well as a  
86 transmembrane SloC lipoprotein that scavenges metal ions for uptake (20, 21). In contrast, during  
87 a mealtime free metal ions are plentiful in the oral cavity, and in response *S. mutans* downregulates  
88 its metal ion importers so as to avoid over-accumulation of intracellular metal ions and their  
89 associated cytotoxic effects. We believe SloR mediates such metalloregulation by binding directly  
90 to  $Mn^{2+}$  which, in turn, promotes SloR dimerization and a subsequent conformational change at  
91 the N-terminus of the protein to facilitate DNA binding. Specifically, in a previous report we  
92 describe SloR-DNA binding upstream of the *sloABC* locus to a promoter-proximal SloR  
93 Recognition Element (SRE) that represses *sloABC* transcription, presumably via a mechanism that  
94 involves promoter exclusion to RNA polymerase (RNAP) (22, 23). Hence, the *sloABC*-encoded

95 metal ion uptake machinery in *S. mutans* is subject to transcriptional repression by SloR under  
96 conditions of  $Mn^{2+}$  availability, and conversely to de-repression when  $Mn^{2+}$  becomes limiting.  
97 The transcriptional regulatory properties of the SloR protein are not limited to the *sloABC* locus.  
98 In fact, work in our laboratory suggests that the SloR protein, a member of the DtxR family of  
99 metalloregulators, may be involved in regulating as many as 200 genes in the *S. mutans* genome,  
100 either directly or indirectly (24). The genes that are subject to SloR control belong to a variety of  
101 different functional categories beyond metal ion homeostasis, and include gene products that  
102 mediate *S. mutans* oxidative stress and acid tolerance, biofilm formation, and genetic competence,  
103 all of which contribute to *S. mutans* virulence (7, 8, 24, 25). In addition, accumulating evidence  
104 in our laboratory supports SloR as more than just a repressor of *S. mutans* gene expression. While  
105 the results of expression profiling studies support SloR-mediated-repression of certain genes  
106 (called Class I genes), the binding of SloR to other gene loci can culminate in gene activation  
107 (called Class II genes) (24). The mechanism by which SloR encourages gene transcription is  
108 unknown and is currently under investigation in our laboratory.

109  
110 Despite the central importance of SloR in promoting *S. mutans* survival and virulence gene  
111 expression, surprisingly little is known of the regulatory mechanism(s) that modulate SloR itself.  
112 To date, the regulation of SloR in *S. mutans* has been shown to be manganese-dependent and  
113 driven, in part, by the *sloABC* promoter via transcriptional read-through of a weak terminator that  
114 is located 3' to the *sloC* gene (7, 20, 22). Hence, SloR levels that derive from *sloABC* promoter  
115 activity likely vary with  $Mn^{2+}$  availability between and during meal times. We propose however,  
116 that some constitutive baseline level of SloR is likely necessary to facilitate scavenging of essential

117 Mn<sup>2+</sup> and/or Fe<sup>2+</sup> by the SloC metal ion importer regardless of exogenous metal ion availability,  
118 and that such fine-tuning could involve additional mechanisms of control.

119

120 In the present study, we set out to determine whether a 184 base pair intergenic region (IGR) that  
121 is located immediately downstream of the *sloC* coding region and upstream of the *sloR* gene,  
122 harbors a specific promoter that drives *sloR* expression independent of *sloABC* promoter activity.

123 We propose that together with a unique and as-yet-unidentified SRE in this IGR, a bifunctional  
124 role for SloR as both a repressor and activator of *S. mutans* gene expression will be supported (26).

125

126 **Results**

127

128 **SloR homodimers bind to a 72bp SRE.** In a previous report, we describe the thermodynamic  
129 binding properties of the *S. mutans* SloR metalloregulator to its cognate SRE within the *sloABC*  
130 promoter region. Herein, the results of fluorescence anisotropy studies conducted with 1mM  
131 manganese and various SRE-containing DNA fragments revealed tight binding of the SloR protein  
132 to a 72bp DNA fragment ( $K_d = 32\text{nM}$ ). Combined with the results of EMSA and DNA  
133 footprinting experiments which support the binding of at least two SloR dimers to this 72bp  
134 sequence, we hypothesized that SloR may bind as a set of homodimers to each of three inverted  
135 hexameric repeats on this 72bp target DNA, each with the consensus sequence AATTAA or some  
136 modification thereof (Figure 1). To test this hypothesis, we used the SloR protein, 1mM  $\text{Mn}^{2+}$ ,  
137 and the predicted 72bp SloR recognition element in negative staining and electron microscopy  
138 experiments. The resulting dataset comprised of 55 total images was classified into two-  
139 dimensional class averages using a PARTICLE software package ([www.image-analysis.net/EM/](http://www.image-analysis.net/EM/)).  
140 The dominant pattern that was revealed by the class averages share a common shape with three  
141 distinct ellipsoidal regions presumed to be SloR dimers (Figure 1 inset, arrowheads), tilted off of  
142 the DNA axis by  $\sim 32^\circ$ . The SloR binding pattern occupies a total length of 239 Angstroms on the  
143 DNA with each SloR dimer measuring  $\sim 90$  Angstroms across, and the distance from the center of  
144 one dimer to the center of the next measures 75 Angstroms (equal to 22bp). Taken together, the  
145 binding pattern and low-resolution image of the SloR-SRE interaction are consistent with the  
146 binding of three SloR dimers to the 72bp target sequence.

147



148 **SloR binding to the 72bp SRE is cooperative.** Equilibrium binding of SloR to fluoresceinated  
149 duplex DNA containing sequences from the *sloABC* promoter region (Table S1) was measured  
150 using fluorescence anisotropy with SloR binding to fluorescently-labeled duplex DNA containing  
151 either one, two, or three 22bp sequences identified previously on the 72bp SRE (labeled A, B and  
152 C in Figure 1). Region B, which includes a pair of inverted repeats, was the only site that  
153 demonstrated SloR-specific binding under conditions as high as 250mM NaCl (data not shown).  
154 Sequences A and C, which deviate from the consensus 22bp sequence at two and three nucleotide  
155 positions respectively, do not measurably bind SloR under these same assay conditions. Saturation  
156 binding to these sequences was observed however, when the salt concentration was lowered to  
157 50mM, albeit along with some non-specific interactions. With that said, when SloR was titrated  
158 into solutions containing 46bp duplexes harboring two contiguous pairs of inverted repeats, either  
159 *sloA\_AB* or *sloA\_BC*, specific cooperative binding was observed under high salt conditions, with  
160 Hill coefficients of 1.8 and 1.7, respectively. This result indicates that SloR is capable of binding  
161 to the A and C sites with high affinity if the B site is already occupied, consistent with SloR  
162 interactions at the B-site that recruit the additional dimers to the flanking A and C sites. In addition,  
163 we measured 50% occupancy of the two sites on *sloA\_AB* and *sloA\_BC* at 26nM and 10nM SloR,  
164 respectively (data not shown). This result corroborates the observed binding of SloR dimers to all  
165 three sites on the 72bp duplex described above in the negative staining experiments.

166

167 **Differential expression of the *S. mutans sloABC* and *sloR* genes suggests the presence of a**  
168 ***sloR*-specific promoter.** To determine whether expression of the *sloABC* and *sloR* genes is  
169 coordinated under conditions of low versus high manganese, we performed qRT-PCR  
170 experiments, the results of which reveal different transcription profiles (Table 2) despite the

171 derivation of these genes from a single polycistronic mRNA. Specifically, expression of the  
172 *sloABC* operon was repressed 3-fold under conditions of high manganese availability (Student's  
173 *t*-test,  $p < 0.05$ ), whereas transcription of the *sloR* gene was not significantly altered under these  
174 same conditions (Student's *t*-test,  $p > 0.05$ ). That expression of the *sloABC* and *sloR* genes is  
175 different under conditions of high  $Mn^{2+}$  suggests an additional control mechanism for *sloR*  
176 transcription that may involve an independent promoter. We predict this promoter is located  
177 within the 184bp intergenic region (IGR) that separates the *sloC* gene of the *sloABC* operon from  
178 the downstream *sloR* gene on the *S. mutans* chromosome.

179

180 **The results of 5' RACE reveal the location of a transcription start site in the intergenic region**  
181 **between the *S. mutans sloC* and *sloR* genes.** To investigate whether a promoter might exist on  
182 the IGR that separates the *sloABC* and *sloR* genes, we performed 5' RACE experiments to identify  
183 a putative +1 transcription start site. The results revealed that transcription of the 654bp *sloR*-  
184 specific transcript begins at an adenosine residue located 19bp upstream of the ATG translation  
185 start codon. Mapping the cDNA sequence back to the *S. mutans* UA159 reference genome allowed  
186 us to predict and annotate the -10 and -35 sites of the predicted *sloR* promoter (Figure 2). The  
187 putative -10 site aligns precisely with the conserved prokaryotic consensus sequence (TATAAT)  
188 whereas there is variation in the sequence between the predicted -35 site and its consensus  
189 sequence in other prokaryotes. A putative extended -10 element which is characterized by a TGN  
190 sequence and the presence of two poly T tracts in the spacer region may compensate for degeneracy  
191 in the -35 promoter.

192

193 **The *S. mutans sloR* gene is transcribed even in the absence of a functional *sloABC* promoter.**

194 To investigate the impact of promoter/SRE variants on transcription of the *S. mutans sloABC*  
195 operon, we introduced transition mutations into the 72bp SRE at positions 11 and 11d, both of  
196 which share overlap with the -35 and -10 promoter sites upstream of *sloABC*, respectively.  
197 Notably, T-to-C mutations at these sites in the resulting GMS611 and GMS611d strain variants  
198 culminated in significantly compromised *sloABC* transcription (Student's t-test,  $p < 0.0001$ ) in  
199 qRT-PCR experiments, with Cq values approaching those of the no template and reverse  
200 transcriptase-minus controls (data not shown). This is consistent with disruption of the *sloABC*  
201 promoter in the GMS611 and GMS611d strain variants. While *sloABC* transcription in these  
202 mutant variants was greatly reduced, transcription of *sloR* was diminished to a much lesser extent  
203 (Student's t-test,  $p < 0.05$ ) that we propose is the result of continued transcription from an  
204 independent, *sloR*-specific promoter (Table 2).

205

206 **The *S. mutans sloR* gene is transcribed from the *sloABC* promoter as well as from an**

207 **independent promoter on the 184bp IGR.** To determine whether *sloR* transcription is indeed  
208 driven by an independent *sloR*-specific promoter, we performed reverse transcriptase PCR (RT-  
209 PCR) experiments with cDNAs that we generated from the *S. mutans* GMS611 and GMS611d  
210 *sloABC* promoter variants and their UA159 wild-type progenitor. As noted above, expression of  
211 the *sloABC* operon in the GMS611 and GMS611d is virtually nil, indicating successful disruption  
212 of the *sloABC* promoter in these strains. In *S. mutans*, expression of the *sloABC* and *sloR* genes  
213 derives from a 3.4Kb polycistronic mRNA owing to transcription off of the UA159 chromosome  
214 that is driven by the upstream *sloABC* promoter and transcriptional readthrough of a weak  
215 terminator at the 3' end of the *sloC* gene (21, 32, 33). Herein, we expect to generate a 2.7Kb

216 polycistronic mRNA by RT-PCR given the positioning of the P1 and P3 primers that span the  
217 *sloABC* operon and the downstream IGR (Figure 3a). In fact, the results of RT-PCR indicate the  
218 presence of a 2.7kb cDNA product in *S. mutans* UA159, and the absence of this product in  
219 GMS611 and GMS611d (Figure 3b). In addition to this polycistronic mRNA however, we noted  
220 the presence of a 250bp cDNA product in all three *S. mutans* strains with the P2/P3 primer pair.  
221 The presence of this amplicon in GMS611 and GMS611d indicates the production of a *sloR*-  
222 specific transcript even in the absence of a functional *sloABC* promoter and supports *sloR*  
223 transcription from an independent promoter. Importantly, PCR products deriving from genomic  
224 DNA when used as the amplification template confirm the specificity of the respective primer pairs  
225 (Figure 3b).

226

227 **SloR binds directly to the intergenic region between the *S. mutans sloC* and *sloR* genes.** To  
228 determine whether the impact of SloR binding on *sloR* transcription is direct, we performed EMSA  
229 experiments, the results of which support direct SloR binding to the intergenic region between the  
230 *S. mutans sloC* and *sloR* genes. Specifically, we observed protein-IGR binding when SloR was  
231 provided at concentrations as low as 400nM, but not at concentrations of 200nM or less (Figure  
232 4a). This contrasts with the SloR binding we observed at the *sloABC* promoter region which  
233 occurred with as little as 60nM SloR protein. These findings support SloR binding to the IGR  
234 with lower affinity than that of SloR binding to the *sloABC* promoter region. In addition, SloR-  
235 IGR binding was abrogated upon the addition of 1.5mM EDTA, consistent with the metal ion-  
236 dependence of the interaction.

237 We also used EMSA to determine the region on the IGR to which SloR binds. To this end,  
238 we generated a series of IGR fragments with serial deletions at their 5' or 3' ends (Figure 4a).

239 Interestingly, robust band shifts were generated with DNA fragments harboring promoter-distal  
240 hexameric repeat sequences that are located at least 62bp upstream of the +1 transcription start  
241 site, but not with DNA fragments less than 62bp from the +1 start site that lack these repeat  
242 sequences (Figure 4b).

243

244 **Expression of the *S. mutans sloR* gene is subject to positive autoregulation.** Direct binding of  
245 SloR to promoter-proximal sequences at the *sloABC* locus and to promoter-distal sequences at the  
246 *sloR* locus, coupled with their negative and positive effects on global gene expression respectively,  
247 led us to hypothesize a role for SloR as a bifunctional regulator in *S. mutans*. To validate such a  
248 dual role for SloR, we performed *in vitro* transcription (IVT) experiments, the results of which  
249 demonstrate unequivocally that *sloABC* transcription is repressed by SloR while transcription of  
250 the *sloR* gene is facilitated by SloR (Figure 5). These findings, quantified with ImageJ software  
251 and in combination with the results of binding studies, indicate that SloR can either repress or  
252 encourage gene expression via direct binding to DNA. To our knowledge, this is the first  
253 experimental evidence to demonstrate bifunctional regulation of gene expression by the SloR  
254 metalloregulator in *S. mutans*.

255

256

## 257 **Discussion**

258 Until recently, work in our laboratory was focused primarily on understanding the mechanism(s)  
259 of SloR binding at the *sloABC* locus, which is subject to transcriptional repression by SloR.  
260 Herein we present evidence that supports an updated model for SloR binding at this locus,  
261 consistent with the direct binding of SloR homodimers to binding sites that span a 72bp region of  
262 DNA which includes the -10 and -35 *sloABC* promoter. In previous work (22), we described a  
263 pattern for SloR binding at the *sloABC* promoter site that involved two SloR dimers binding to two  
264 sets of inverted repeats, each 6bp in length and separated by 8bp. Subsequent analysis of the 72bp  
265 region upstream of the *sloABC* operon suggested that, in fact, SloR binds to three distinct but  
266 abutting 22bp sites in that region, referred to herein as A, B, and C. Each binding site is comprised  
267 of two inverted hexameric repeats with an AATTAA consensus separated by 6bp, thereby defining  
268 a putative 6-6-6 motif for SloR binding (Figure 1). This sequence pattern  
269 (xxAATTAAxxxxxxTTAATTxx, where “x” is a non-conserved nucleotide) is similar to that of  
270 the SloR homolog in *S. gordonii*, called ScaR, which binds to two adjacent 22bp sites upstream of  
271 the *scaABC* operon (34) and for which the binding pattern was confirmed by negative staining and  
272 electron microscopy (unpublished observations). We therefore expanded what we previously  
273 thought to be a 42bp SRE in the *sloABC* promoter region to include at least 30 additional base  
274 pairs.

275

276 While SloR binds to the central 22bp SRE (region B) with strong affinity when provided as a  
277 template in isolation, we measured cooperative interactions between SloR homodimers when  
278 bound to adjacent SRE sequences (regions A and C). These cooperative interactions are strong  
279 enough to support high affinity binding between SloR homodimers, presumably because of

280 interactions involving the initial binding of SloR homodimers to the B site. Such cooperativity  
281 has likewise been observed for the *S. gordonii* ScaR protein (32), suggesting that this property may  
282 be a common feature among interactions involving other streptococcal manganese-dependent  
283 regulators and their promoter/operator sequences.

284

285 In the present study, we extend our SloR binding observations to include the details of protein  
286 binding to the IGR that immediately precedes the *S. mutans sloR* gene. Based on accumulating  
287 evidence presented herein, we propose that the location of the SloR-DNA binding element relative  
288 to the promoter sequences that modulate downstream *sloABC* and *sloR* gene transcription  
289 contributes to SloR's ability to differentially down-regulate *sloABC* promoter activity and up-  
290 regulate *sloR* promoter activity. Interestingly, an *in silico* analysis of the 184bp IGR that precedes  
291 the *S. mutans sloR* gene failed to reveal a recognizable SRE like the one we describe above for the  
292 *sloABC* locus, consistent with differential regulation by SloR at these two loci.

293

294 The transcription start site for the *S. mutans sloR* gene occurs within the 184bp IGR that separates  
295 *sloR* from the *sloABC* operon immediately upstream, as determined in 5'RACE experiments.  
296 From the +1 transcription start site, -10 and -35 promoter regions were predicted and a 19bp 5'  
297 untranslated region (UTR) was defined. Notably, the hexameric -10 region shares 100% sequence  
298 identity with the canonical prokaryotic consensus sequence for a -10 promoter (TATAAT) (35,  
299 36). An *in silico* analysis of the *sloR* promoter revealed a putative extended -10 element in the  
300 IGR which is absent from the *sloABC* promoter region. Reports in the literature describe such a  
301 TGN motif immediately upstream of the -10 sequence as an element that could facilitate  
302 downstream transcription by stabilizing the open complex during initiation, and by shortening the

303 distance between the -10 and -35 sites (34, 37). The contact that RNA polymerase makes  
304 with the nonamer that defines the extended -10 site could compensate for the suboptimal  
305 contact that the polymerase makes with the degenerate -35 sequence (37). The TGN motif that we  
306 noted on the *sloR*-containing IGR is similarly located 14-16 nucleotides upstream of the  
307 transcription start site. Previous studies have also noted that short poly(T) tracts are characteristic  
308 to the spacer region of *E. coli* TG promoters (38). We similarly noted the presence of two poly(T)  
309 tracts centered at positions -18 and -29 in the spacer region of *sloR*'s TG promoter.

310  
311 In contrast to the -10 promoter region, the predicted -35 site (TATCCA) shares only 50% sequence  
312 identity with the typical prokaryotic promoter sequence (TTGACA) (35). This is not surprising  
313 given frequent reports of sequence variation in and around the -35 promoter region within and  
314 across prokaryotic species (39). Since promoter strength is, in part, determined by conservation of  
315 the -10 and -35 promoter sequences (36) one might expect RNAP to have only moderate binding  
316 affinity for the relatively divergent *sloR* promoter (TATAAT and TATCCA) as compared to  
317 RNAP binding at the more highly conserved *sloABC* promoter (TATATT and TTGACT) (22),  
318 and accordingly, weaker transcription from the former as compared to the latter. The results of  
319 DNA binding and expression profiling experiments reported herein support these predictions and  
320 suggest a role for divergent *sloABC* and *sloR* promoter sequences in fine-tuning metal ion transport  
321 and minimizing the toxic effects of metal ion hyper-accumulation. Additional layers of gene  
322 control involving SloR likely evolved at these loci given the importance of maintaining metal ion  
323 homeostasis under conditions as transient as those in the oral cavity.

324



325 The absence of a recognizable SloR binding motif in the IGR that precedes *sloR* is consistent with  
326 differential gene regulation and SloR binding at this locus versus that at the *sloABC* locus. That  
327 is, three adjacent palindromes on the 72bp SRE appear to be absent from the IGR, although a pair  
328 of consensus palindromes with the sequence AATTAA appear to be uniquely located 44-50bp and  
329 94-100bp distal to the *sloR* promoter, respectively. Interestingly, reports in the literature describe  
330 AT-rich sequences, including palindromes like those in the *sloABC* and *sloR* promoters, that can  
331 engender intrinsic curvatures in the DNA (24, 38). To assess inherent DNA curvature in the  
332 *sloABC* and *sloR* promoter regions, we applied a BEND algorithm (40) to the 72bp *sloABC* SRE  
333 and the 184bp IGR, the results of which revealed high fidelity alignment of AT-rich palindromes  
334 with predicted sites for SloR binding (data not shown). Hence, DNA curvature that localizes to  
335 the paired palindromic repeats at the *sloABC* and *sloR* loci supports a SloR-DNA interaction that  
336 is not strictly defined by nucleotide sequence specificity, but by DNA conformation as well.  
337 EMSA studies are currently underway to determine what impact, if any, these AT-rich palindromes  
338 may have on SloR-DNA binding, and whether the DNA curvature they can instigate contributes  
339 to SloR's function as a repressor versus an enhancer of gene transcription.

340

341 Differential expression of the *sloABC* and *sloR* genes was especially pronounced in *in vitro*  
342 transcription (IVT) assays where we used the 5' end of the *sloA* or *sloR* coding regions and up to  
343 200bp of upstream DNA sequence as the DNA template. Pixel counting of the resulting mRNA  
344 transcripts on autoradiograms, performed with Image J, revealed considerably more robust *sloR*  
345 transcription in the presence of exogenous SloR than in its absence (Figure 5). This contrasts with  
346 the *in vitro* transcription we observed for the upstream *sloABC* operon which, as expected, was  
347 repressed by the presence of SloR. Taken together with the EMSA results that support direct SloR

348 binding at these loci, these data demonstrably support a role for SloR as a bifunctional regulator  
349 of *S. mutans* gene transcription. While the mechanism for *sloABC* repression likely derives from  
350 SloR binding to an SRE that shares overlap with the *sloABC* promoter, thereby excluding RNAP  
351 from promoter access, *sloR* transcription is the likely result of de-repression with SloR binding to  
352 promoter-distal sites. In future work, we will consider  $Mn^{2+}$  status as a potential contributor to  
353 differential SloR binding and gene transcription outcomes. In fact, binding of the MntR  
354 metalloregulator to different sequences upstream of the *mntABCD* locus in *Bacillus subtilis* is  
355 known to be  $Mn^{2+}$  concentration-dependent (41).

356  
357 In summary, the results of the present study support SloR-mediated transcriptional events at the  
358 *sloR* locus that are different from those at the *sloABC* locus and lend further support to a role for  
359 SloR as a bifunctional regulator of gene transcription. It's tempting to suggest that the *sloR*-  
360 specific promoter on the 184bp IGR evolved to ensure at least some level of constitutive SloR  
361 production. Accordingly, when free metal ions are introduced into the oral cavity during a  
362 mealtime, *S. mutans* is poised and ready to modulate the controlled uptake of the exogenous  $Mn^{2+}$   
363 and  $Fe^{2+}$  it needs for survival. Hence, while the sudden introduction of metal ions into the mouth  
364 could prove damaging to some constituents of the oral microbiota, *S. mutans* can exploit these  
365 conditions with a metal ion-dependent SloR regulator that can repress the cytotoxic effects of  
366 excessive metal ion import, while maintaining baseline levels of SloR from an ancillary promoter.  
367 Such fine-tuned gene regulation can impact cell function beyond the scope of metal ion  
368 homeostasis, and influence processes like adherence, acid production and the oxidative stress  
369 response that more directly contribute to *S. mutans*-induced disease (7, 8, 24, 25). In conclusion,  
370 we propose that *S. mutans* coordinates the regulated expression of its metal ion transport machinery

371 with that of its virulence attributes. An improved understanding of *sloR* autoregulation is  
372 significant because it can elucidate the mechanisms that fine-tune the regulated expression of metal  
373 ion homeostasis and virulence in an important oral pathogen. Moreover, from these investigations  
374 we may better elucidate the details of SloR-mediated gene regulation that can benefit the design  
375 of an anti-SloR therapeutic aimed at alleviating and/or preventing caries.

376 **Materials & Methods**

377

378 **Bacterial strains, plasmids, and primers.** The bacterial strains used in this study are listed in  
379 Table 1. Working stocks of each bacterial strain were prepared from overnight cultures and stored  
380 in 20% or 50% sterile glycerol at -20°C or -80°C, respectively.

381 The primers used in this study are shown in Table 1. All primers were designed using the  
382 Primer Blast tool from the NCBI website. A RefSeq record was used as the input with forward and  
383 reverse primer locations specified by the user. Lack of secondary structure was confirmed using  
384 the Oligo Evaluator tool (Sigma) and primers were checked for specificity against the *S. mutans*  
385 UA159 genome with the NCBI Basic Local Alignment Search Tool (BLAST).

386

387 **Negative-staining and EM analysis.** A SloR-Mn<sup>2+</sup>-72bp SRE complex was prepared *in vitro*  
388 assuming a 3:1 stoichiometry of dimers to DNA. The reaction mixtures were then systematically  
389 diluted to 25, 50 and 100nM for negative-stain EM grid preparation using 1% uranyl acetate. After  
390 screening for the optimal staining quality and particle concentration, single-particle data were  
391 collected on the 50 nM specimen grid using an FEI T12 electron microscope at 120KeV and  
392 68,000x nominal magnification, producing 108 micrographs at 3.15 Å/pixel in the image with  
393 varying defocus between 0.9 and 1.8 µm. Then, 8,500 particles of the SloR-DNA complex were  
394 selected for 2D classification using the PARTICLE ([www.sbgrid.org/software/titles/particle](http://www.sbgrid.org/software/titles/particle))  
395 program.

396

397 **Construction of *S. mutans* promoter variants.** To generate specific mutations in the promoters  
398 that drive *sloABC* transcription, we adopted a markerless mutagenesis strategy similar to that  
399 described by Xie *et al.* (27). This involved constructing promoter variants with an IFDC2 cassette

400 inserted within the *sloABC* promoter region for subsequent CSP-transformation into *S. mutans*  
401 UA159 to generate the erythromycin-resistant and p-4-chlorophenylalanine-sensitive GMS602  
402 strain. The double-crossover event was confirmed by polymerase chain reaction (PCR) and Sanger  
403 sequencing. Derivatives of GMS602 were generated by overlap extension PCR (OE-PCR) with  
404 the reverse primers harboring a single point mutation in the predicted 72bp SRE that precedes the  
405 *sloABC* genes (Table 1). *S. mutans* GMS611 was generated with degenerate primers that  
406 introduced a point mutation into the SRE at nucleotide position 11 that we predict shares overlap  
407 with the *sloABC*-specific -35 promoter region (22). Likewise, GMS611d was generated with a  
408 different degenerate primer set that introduced a point mutation at position 11d into the SRE, which  
409 we predict shares overlap with the *sloABC*-specific -10 promoter region. Thymine to cytosine  
410 transition mutations were generated in both *S. mutans* strains and validated by Sanger sequencing  
411 (22).

412

413 **Chromosomal DNA Isolation.** *S. mutans* grown overnight at 37°C and 5% CO<sub>2</sub> in 14ml Todd-  
414 Hewitt Yeast Extract (THYE) broth were pelleted by centrifugation at 7000rpm for 5 minutes in a  
415 Sorvall RCB centrifuge after which the cells were resuspended in 1ml Tris-EDTA buffer (10mM  
416 Tris, 1mM EDTA) and chemically disrupted according to established protocols (8, 22). Genomic  
417 DNA was purified in subsequent rounds of phenol-chloroform extraction, ethanol precipitated, and  
418 resuspended overnight in nuclease-free water (Ambion) at 4°C with gentle agitation (28). Nucleic  
419 acid yield and purity were assessed with a NanoDrop Lite spectrophotometer (Thermo Fisher  
420 Scientific) and the samples were stored at -20°C.

421

422 **RNA Isolation.** RNA was isolated from *S. mutans* strains according to established protocols (8).  
423 Cells were grown to mid-logarithmic phase ( $OD_{600nm} = 0.4-0.6$ ) before pelleting by centrifugation  
424 as described above and resuspending in RNAProtect (Qiagen). Total intact RNA was purified  
425 following cell lysis and DNase I treatment with a Qiagen RNeasy kit after which nucleic acid yield  
426 and purity were assessed with a NanoDrop Lite spectrophotometer (Thermo Fisher Scientific).  
427 RNA samples were analyzed for integrity by agarose gel electrophoresis and stored at  $-80^{\circ}C$ .

428  
429 **RT-PCR.** Reverse-transcriptase PCR was performed with cDNAs that were reverse-transcribed  
430 from RNA using a First Strand cDNA Synthesis kit according to the recommendations of the  
431 supplier (Thermo Fisher Scientific) or else with chromosomal DNA isolated from *S. mutans*  
432 UA159, GMS611, or GMS611d according to a modification of Idone *et al.* (29). Q5 Hi-Fidelity  
433 Polymerase was used for PCR in accordance with the recommendations of the supplier (New  
434 England Biolabs). Each 50  $\mu L$  PCR reaction consisted of 10  $\mu L$  5X Q5 Reaction buffer, 1  $\mu L$   
435 10mM dNTPs, 2.5  $\mu L$  *sloA*.RT\_PCR.F or *sloR*.RT\_PCR.F, 2.5  $\mu L$  *sloA*.RT\_PCR.R or  
436 *sloR*.RT\_PCR.R [Table 1]), 200 ng of genomic DNA or 1  $\mu L$  of cDNA product, nuclease-free  
437 water up to 49.5  $\mu L$ , and 0.5  $\mu L$  of Q5 Hi-Fi Polymerase added to the reaction just prior to  
438 amplification. PCR conditions were as follows: initial denaturation at  $98^{\circ}C$  for 30 s, followed by  
439 25 cycles of denaturation at  $98^{\circ}C$  for 10 s, annealing at  $67^{\circ}C$  for 30 s, and extension at  $72^{\circ}C$ ,  
440 concluding with a final extension at  $72^{\circ}C$  for 80 s. An aliquot of each sample was visualized on  
441 0.8% agarose gels as described above.

442  
443 **5' RACE.** To reveal the *sloR* transcription start site and predict the -10 and -35 regions of the *sloR*  
444 promoter we performed 5' Rapid Amplification of cDNA Ends (5' RACE) with an Invitrogen 5'

445 RACE Kit in accordance with the manufacturer's protocol unless otherwise specified. RNA  
446 isolated from *S. mutans* GMS611 and GMS611d was reverse-transcribed into cDNA using a  
447 *sloR*.[R].GSP1.A reverse primer and 200 U of Superscript II Reverse Transcriptase. After  
448 S.N.A.P. column purification, the cDNA was poly(-dC) tailed using terminal deoxynucleotidyl  
449 transferase as described in the manufacturer's protocol. The cDNA products were PCR amplified  
450 using the kit-supplied Abridged Anchor Primer (AAP), a *sloR*.[R].GSP2.B reverse primer, and  
451 Platinum Hi-Fi *Taq* polymerase, in a BioRad PCR machine programmed at 94°C for 2 minutes,  
452 followed by 35 cycles of 94°C for 15 s, 58°C for 30 s, and 68°C for 1 minute, and a final hold at  
453 4°C. An aliquot of the resulting PCR product was analyzed by agarose gel electrophoresis and the  
454 remainder was purified using a MinElute PCR Purification kit in accordance with the  
455 recommendations of the supplier (Qiagen). The purified amplicons were quantified using a  
456 NanoDrop Lite spectrophotometer (Thermo Fisher Scientific) and sequenced (Eurofins) using the  
457 reverse primers *sloR*.GSP2.A or *sloR*.nested.GSP. The 5' sequence of the mRNA transcript was  
458 aligned with the *S. mutans* UA159 reference genome (RefSeq accession number NC\_004350.2)  
459 from NCBI to identify the nucleotide that immediately follows the poly(-dC)-tail as the  
460 transcription start site (+1 site), predict the -10 and -35 promoter sequences in the 184bp intergenic  
461 region, and reveal the 5' untranslated region of the *sloR* transcript (30).

462

463 **EMSA.** Electrophoretic mobility shift assays (EMSAs) were performed according to established  
464 protocols to determine whether SloR binding to the intergenic region upstream of the *sloR* gene is  
465 direct, and to narrow down the region of SloR binding at this locus (8, 22, 23). Primer design for  
466 the DNA binding template spanned the 184bp intergenic region (IGR) between *sloC* and *sloR* and  
467 included serial deletions thereof. PCR amplification was performed with Q5 polymerase

468 according to the manufacturer's protocol (New England Biolabs) using the following thermal  
469 cycling conditions: initial denaturation at 98°C for 30 s, 35 cycles at 98°C for 10 s, annealing at  
470 60°C for 30 s, and extension at 72°C for 30 s, with a final extension at 72°C for 2 minutes. The  
471 resulting amplicons were PCR purified as described earlier, confirmed by agarose gel  
472 electrophoresis, and quantified by NanoDrop spectrophotometry.

473

474 The resulting amplicons were end-labeled with [ $\gamma$ -<sup>32</sup>P]-dATP (Perkin-Elmer) in the presence of T<sub>4</sub>  
475 polynucleotide kinase (New England BioLabs) after which they were centrifuged through a TE  
476 Select-D G-25 spin column (Roche Applied Science) to remove the unincorporated <sup>32</sup>P-dATP.  
477 Binding reactions were prepared as described previously (23) in a 16- $\mu$ l total volume containing 1  
478  $\mu$ l of end-labeled amplicon, purified native SloR protein at concentrations ranging from 60 nM to  
479 400nM, and 3.2  $\mu$ l of 5 $\times$  binding buffer (42 mM NaH<sub>2</sub>PO<sub>4</sub>, 58 mM Na<sub>2</sub>HPO<sub>4</sub>, 250 mM NaCl, 25  
480 mM MgCl<sub>2</sub>, 50  $\mu$ g/ml bovine serum albumin, 1 mg sonicated salmon sperm DNA, 50% [vol/vol]  
481 glycerol, and 37.5  $\mu$ M MnCl<sub>2</sub>). EDTA was added to a separate reaction mixture at a final  
482 concentration of 1.5mM to validate SloR binding that is metal ion-dependent. An end-labeled *sloA*  
483 promoter-containing amplicon was used as a positive control for SloR binding (7, 22, 23). Samples  
484 were loaded onto 12% nondenaturing polyacrylamide gels (3 ml 20 $\times$  bis-Tris borate [pH 7.4], 74  
485  $\mu$ l 100 nM MnCl<sub>2</sub>, 1.5 ml 100% glycerol, 24 ml 30% acrylamide [37.5:1 acrylamide-bis], 31 ml  
486 Millipore H<sub>2</sub>O, 300  $\mu$ l 15% ammonium persulfate [APS], 90  $\mu$ l TEMED [*N,N,N',N'*-  
487 tetramethylethylenediamine]) and resolved at 300 volts for 1.5 hours. Gels were exposed to Kodak  
488 BioMax film for 24-72 hours at -80°C in the presence of an intensifying screen prior to  
489 autoradiography.

490



491 **Fluorescence anisotropy.** Equilibrium binding of SloR to regions within the *sloABC*  
492 promoter/operator region was probed by titrating SloR onto fluoresceinated DNA and monitoring  
493 binding by fluorescence anisotropy. Duplex DNA fragments containing relevant sequences were  
494 prepared from oligonucleotides obtained from Integrated DNA Technologies (Coralville, IA). A  
495 5' fluoresceinated oligonucleotide was annealed with a 10% excess of its unlabeled  
496 complementary strand in 25mM HEPES, pH7.9, 50mM NaCl by heating to 90°C and cooling  
497 slowly to room temperature (Table S1). Titrations were performed in either high or low salt  
498 buffers; the high salt buffer contained 25mM HEPES, pH 8.0, 250mM NaCl, 10% glycerol and  
499 1mM MnCl<sub>2</sub> whereas the low salt buffer contained 25mM HEPES, pH7.9, 50mM NaCl, and 1mM  
500 MnCl<sub>2</sub>. SloR was titrated into 1ml of 1nM fluoresceinated duplex DNA in buffer and anisotropy  
501 measurements were made at 25°C using a Beacon 2000 fluorescence polarization instrument. Data  
502 were fit to one of several equations related to simple 1:1 binding stoichiometry, where K<sub>d</sub> was  
503 greater than 10nM (equation 1), less than 10nM (equation 2) or to the Hill equation (equation 3).

504

505 
$$r = \Delta r \times \frac{P}{K_d + P} + r_{min} \quad (\text{equation 1})$$

506 
$$r = \Delta r \times \frac{K_d + D + P - \sqrt{(K_d + D + P)^2 - 4DP}}{2D} + r_{min} \quad (\text{equation 2})$$

507 
$$r = \Delta r \times \frac{P^n}{K_h^n + P^n} + r_{min} \quad (\text{equation 3})$$

508 In these equations, r is anisotropy, Δr is the total change in anisotropy at saturation, K<sub>d</sub> is the  
509 dissociation constant, K<sub>h</sub> is the concentration of SloR dimers giving 50% maximal binding under  
510 cooperative conditions, n is the Hill coefficient, and r<sub>min</sub> is the anisotropy obtained before addition  
511 of SloR. P is the concentration of SloR dimers and D is the concentration of duplex DNA. In  
512 addition, where non-specific binding prevented signal saturation, a term to model the slow linear

513 increase in anisotropy was added to equations 1 or 2, with the form  $K_{ns}P$  where  $K_{ns}$  is the non-  
514 specific binding constant. All curve fitting was performed in R software.

515

516 **Preparation of *S. mutans* RpoD.** An *E. coli* DH5 $\alpha$  strain harboring plasmid pIB611 (kind gift of  
517 Indranil Biswas, University of Kansas) was streaked for isolation on L-agar plates supplemented  
518 with ampicillin (100  $\mu$ g/mL) and incubated overnight at 37°C. Resident on pIB611 is the *S. mutans*  
519 *rpoD* gene cloned directly downstream of an inducible operon on vector pET-23d(+) and upstream  
520 of a C-terminal His-tag (31). Importantly, the 6x His-tag was shown in *in vitro* transcription  
521 experiments to have no physiological impact on RpoD functionality (31). Plasmid pIB611 was  
522 purified with a Qiagen miniprep kit according to the recommendations of the supplier and mapped  
523 by restriction digestion (New England Biolabs).

524

525 Next, pIB611 was used to transform *E. coli* BL21 DE3 cells in accordance with the manufacturer's  
526 protocol (Invitrogen). Successful transformants were selected after overnight growth on L-agar  
527 plates supplemented with 100 $\mu$ g/mL ampicillin and used to inoculate a 25 mL starter culture for  
528 yet another overnight incubation. This culture was then used to inoculate 500 mL of pre-warmed  
529 L-ampicillin (100 $\mu$ g/ml) broth in a 2.8 L Fernbach flask which was incubated at 37°C with  
530 continuous shaking at 200rpm. When the cells reached mid-log phase ( $OD_{600}=0.4$ ), isopropyl  $\beta$ -  
531 D-1-thiogalactopyranoside (IPTG) was added at a final concentration of 0.5mM to induce  
532 expression of the T7 RNA polymerase in the BL21 DE3 cells. Protein induction proceeded with  
533 continuous shaking for an additional 3.5 hours after which the cells were centrifuged as previously  
534 described and stored as dry pellets at -80°C.

535

536 Cell pellets were resuspended in His-Binding Buffer (0.5M NaCl, 20mM Tris-HCl, 5mM  
537 imidazole) with Halt EDTA-free protease inhibitor at 1x concentration (Thermo Fisher Scientific).  
538 The cell suspension was sonicated (Ultrasonic Power Corporation, model number: 2000U) at 60%  
539 power for six 30-second cycles using a 0.5 second pulse, with samples maintained on ice between  
540 runs. Cells were pelleted by centrifugation at 10,000 x g for 30 minutes at 4°C, after which aliquots  
541 of the supernatant and 2X Laemmli buffer (4% SDS, 20% glycerol, 10% 2-mercaptoethanol,  
542 0.004% bromophenol blue and 0.125 M Tris HCl, pH 6.8) were mixed in equal proportions and  
543 resolved on 10% Bis-Tris polyacrylamide gels in 3-(N-morpholino) propanesulfonic acid (MOPS)  
544 buffer. Proteins were visualized with Sypro Ruby Gel Stain (Thermo Fisher Scientific) according  
545 to the manufacturer's instructions. Polyacrylamide gels were fixed for 45 minutes in fixative  
546 solution (50% methanol, 7% acetic acid) with gentle shaking on an orbital shaker. The fixative  
547 was subsequently decanted and replaced with 80 mL of Sypro Ruby Gel Stain. Gels were covered  
548 and left to stain on an orbital shaker overnight at room temperature. The gel stain was decanted  
549 and wash solution (10% methanol, 7% acetic acid) added before UV visualization.

550

551 The remaining cell lysate was further purified by Ni<sup>2+</sup>-Nitrilotriacetic acid (Ni-NTA) column  
552 chromatography (Thermo Fisher Scientific) at 4°C according to the manufacturer's instructions.  
553 The columns were placed on a rotating platform for 30 minutes at 4°C to encourage RpoD binding  
554 to the Ni-NTA resin before centrifugation to remove unbound protein from the column. After  
555 elution, protein yield was determined using both NanoDrop Lite spectrophotometry and a  
556 bicinchoninic acid (BCA) protein determination assay (Thermo Fisher Scientific). RpoD purity  
557 was assessed on SDS-PAGE gels following Sypro Ruby staining. Select fractions containing  
558 RpoD were dialyzed using G2 Slide-A-Lyzer Cassettes with a 10 kDa molecular weight cut off

559 (Thermo Fisher Scientific) in dialysis buffer (25% glycerol in 1x PBS). RpoD was assayed for  
560 concentration as described above and stored at -20°C.

561

562 ***In vitro* transcription.** *In vitro* transcription was performed according to an adaptation of Kajfasz  
563 et al (9). First, genomic DNA spanning approximately 100-200bp of the *sloA* or *sloR* coding  
564 region and about 150-200bp of upstream sequence was amplified by PCR with Q5 polymerase  
565 (New England Biolabs) and either PM.IVT.*sloA*.F and PM.IVT.*sloA*.R or PM.IVT.*sloR*.F and  
566 PM.IVT.*sloR*.R (Table S1) according to the following thermal cycling conditions: initial  
567 denaturation at 98°C for 30 s, 35 cycles at 98°C for 10 s, annealing (60°C for *sloA*, 67°C for *sloR*)  
568 for 30 s, and extension at 72°C for 30 s, with a final extension at 72°C for 2 minutes. The resulting  
569 amplicons were PCR purified as described earlier and confirmed by agarose gel electrophoresis.  
570 DNA concentration was determined spectrophotometrically on a NanoDrop Lite  
571 spectrophotometer. Next, in 1.5 mL microfuge tubes, 10 nM DNA template (*sloA* or *sloR*), 1U *E.*  
572 *coli* RNA Polymerase core enzyme (New England Biolabs), 20U of SUPERase RNase Inhibitor  
573 (Thermo Fisher Scientific), 25 nM *S. mutans* RpoD extract (based on BCA assay), +/- 75nM  
574 purified SloR were mixed in Reaction Buffer (10 Mm Tris-HCl [pH 8.0], 50 mM NaCl, 5 mM  
575 MgCl<sub>2</sub>, 50 µg/mL bovine serum albumin) to yield a final volume of 17.8 µL and incubated at 37°C  
576 for 10 minutes. To generate an mRNA transcript, 2.2 µL of Nucleotide Mixture (200 µM ATP,  
577 200 µM GTP, 200 µM CTP, 10 µM UTP) and 5 µCi α<sup>32</sup>P-UTP (Perkin Elmer) were then added  
578 and the reaction was incubated at 37°C for 10 minutes. 10 µL of Stop Solution (1M ammonium  
579 acetate, 0.1 mg/mL yeast tRNA (Ambion), 0.03M EDTA) was added to terminate transcription,  
580 after which 90 µL of ice-cold 99% EtOH was added for ethanol precipitation overnight at 4°C.  
581 The following day samples were pelleted at 16,200 x g for 30 minutes, followed by three rounds

582 of washing with 70% EtOH, with additional centrifugation between washes. A final wash with  
583 99% EtOH was performed after which the samples were lyophilized in a vacuum centrifuge  
584 (Eppendorf) for 10 minutes. The radiolabeled cell pellet was resuspended in 5  $\mu$ L of formamide  
585 dye (0.3% xylene cyanol, 0.3% bromophenol blue, 12mM EDTA, dissolved in formamide) and  
586 the samples were heated to 70°C in a water bath for 2 minutes before placing on ice for gel loading.  
587 Samples were resolved on a Novex 10% TBE-7M Urea Gel in 1X TBE Buffer (10.8 g Tris, 5.5g  
588 boric acid, 0.01M EDTA [pH 8.0]) and mRNA transcripts were visualized via autoradiography  
589 using BIOMAX XAR Film (Thermo Fisher Scientific) exposed for up to 4 hours at -80°C in the  
590 presence of an intensifying screen. Film was developed according to standard protocols and  
591 ImageJ software was used to quantify the band intensities between samples.

592

593 **Semi-quantitative real-time PCR (qRT-PCR).** Total intact RNA was isolated from mid-  
594 logarithmic phase *S. mutans* cultures of the wild-type UA159 strain grown in a semi-defined  
595 medium (SDM) (22) supplemented with either 5 $\mu$ M (low) or 125 $\mu$ M (high) MnSO<sub>4</sub>. The resulting  
596 RNAs were analyzed for integrity on 0.8% agarose gels before reverse-transcribing 100ng of each  
597 RNA sample into cDNA as described above. The cDNAs were used as templates for qRT-PCR  
598 which was performed in accordance with established protocols (22) in a CXR thermal cycler  
599 (BioRad). Specifically, *sloABC* and *sloR* transcription was assessed in three independent qRT-  
600 PCR experiments, each performed in triplicate and normalized against the expression of *gyrA*  
601 (8,22).

602

603 To assess the impact of transition mutations in the SRE that precedes the *sloABC* operon on  
604 downstream *sloR* transcription, *S. mutans* GMS611 and GMS611d were grown as described above

605 except without supplemental  $Mn^{2+}$ . Total intact RNA was isolated and reverse transcribed as  
606 described, and the results of qRT-PCR were normalized against *hk11*, the expression of which  
607 does not change under the experimental test conditions.

608

609 **Acknowledgements**

610 This research was supported by NIH Grant #DE014711 to G.A.S., the T. Ragan Ryan Summer  
611 Research Fund to P.M., and by the Middlebury College Department of Biology. We acknowledge  
612 Mr. Gary Nelson for figure preparation and Dr. Indranil Biswas for providing plasmid pIB611.  
613 Many thanks to Dr. Robert Haney for his bioinformatics expertise and assistance with the  
614 microarray data, to Dr. Jessica Kajfasz for her guidance with the IVT experiments, and to Mr.  
615 Frank Spatafora for general technical assistance. We declare no conflicts of interest for this work.

616

617 **References**

- 618 1. Dye B, Thornton-Evans G, Li X, Iafolla T. 2015. Dental Caries and Tooth Loss in Adults in  
619 the United States, 2011-2012. National Center for Health Statistics.
- 620 2. 2012. WHO | Oral health. Fact Sheet 318. World Health Organization.
- 621 3. Oral Health in America: A Report of the Surgeon General (Executive Summary).
- 622 4. Loesche WJ. 1986. Role of *Streptococcus mutans* in human dental decay. *Microbiol Rev*  
623 50:353–380.
- 624 5. Krzyściak W, Jurczak A, Kościelniak D, Bystrowska B, Skalniak A. 2014. The virulence of  
625 *Streptococcus mutans* and the ability to form biofilms. *Eur J Clin Microbiol Infect Dis*  
626 33:499–515.
- 627 6. Tamura S, Yonezawa H, Motegi M, Nakao R, Yoneda S, Watanabe H, Yamazaki T,  
628 Senpuku H. 2009. Inhibiting effects of *Streptococcus salivarius* on competence-stimulating  
629 peptide-dependent biofilm formation by *Streptococcus mutans*. *Oral Microbiol Immunol*  
630 24:152–161.
- 631 7. Rolerson E, Swick A, Newlon L, Palmer C, Pan Y, Keeshan B, Spatafora G. 2006. The  
632 SloR/Dlg Metalloregulator Modulates *Streptococcus mutans* Virulence Gene Expression. *J*  
633 *Bacteriol* 188:5033–5044.
- 634 8. Crepps SC, Fields EE, Galan D, Corbett JP, Von Hasseln ER, Spatafora GA. 2016. The SloR  
635 metalloregulator is involved in the *Streptococcus mutans* oxidative stress response. *Mol Oral*  
636 *Microbiol* 31:526–539.



- 637 9. Kajfasz JK, Rivera-Ramos I, Scott-Anne K, Gregoire S, Abranches J, Lemos JA. 2015.  
638 Transcription of Oxidative Stress Genes Is Directly Activated by SpxA1 and, to a Lesser  
639 Extent, by SpxA2 in *Streptococcus mutans*. *J Bacteriol* 197:2160–2170.
- 640 10. Baker JL, Faustoferra RC, Quivey RG. 2016. Acid- adaptive mechanisms of *Streptococcus*  
641 *mutans*—the more we know, the more we don't. *Mol Oral Microbiol*.
- 642 11. Fozo EM, Kajfasz JK, Quivey RG. 2004. Low pH-induced membrane fatty acid alterations  
643 in oral bacteria. *FEMS Microbiol Lett* 238:291–295.
- 644 12. Kawada-Matsuo M, Oogai Y, Komatsuzawa H. 2016. Sugar Allocation to Metabolic  
645 Pathways is Tightly Regulated and Affects the Virulence of *Streptococcus mutans*. *Genes* 8.
- 646 13. van Houte J. 1994. Role of Micro-organisms in Caries Etiology. *J Dent Res* 73:672–681.
- 647 14. Touger-Decker R, Loveren C van. 2003. Sugars and dental caries. *Am J Clin Nutr* 78:881S-  
648 892S.
- 649 15. Kilian M, Chapple ILC, Hannig M, Marsh PD, Meuric V, Pedersen AML, Tonetti MS, Wade  
650 WG, Zaura E. 2016. The oral microbiome – an update for oral healthcare professionals. *Br*  
651 *Dent J* 221:657–666.
- 652 16. Peterson SN, Snetsrud E, Liu J, Ong AC, Kilian M, Schork NJ, Bretz W. 2013. The Dental  
653 Plaque Microbiome in Health and Disease. *PLoS ONE* 8.
- 654 17. Smith EG, Spatafora GA. 2012. Gene Regulation in *S. mutans*: Complex Control in a  
655 Complex Environment. *J Dent Res* 91:133–141.

- 656 18. Aranha H, Strachan RC, Arceneaux JE, Byers BR. 1982. Effect of trace metals on growth of  
657 *Streptococcus mutans* in a teflon chemostat. *Infect Immun* 35:456–460.
- 658 19. Martin ME, Strachan RC, Aranha H, Evans SL, Salin ML, Welch B, Arceneaux JE, Byers  
659 BR. 1984. Oxygen toxicity in *Streptococcus mutans*: manganese, iron, and superoxide  
660 dismutase. *J Bacteriol* 159:745–749.
- 661 20. Paik S, Brown A, Munro CL, Cornelissen CN, Kitten T. 2003. The sloABCR Operon of  
662 *Streptococcus mutans* Encodes an Mn and Fe Transport System Required for Endocarditis  
663 Virulence and Its Mn-Dependent Repressor. *J Bacteriol* 185:5967–5975.
- 664 21. Kitten T, Munro CL, Michalek SM, Macrina FL. 2000. Genetic Characterization of a  
665 *Streptococcus mutans* *LraI* Family Operon and Role in Virulence. *Infect Immun* 68:4441–  
666 4451.
- 667 22. Spatafora G, Corbett J, Cornacchione L, Daly W, Galan D, Wysota M, Tivnan P, Collins J,  
668 Nye D, Levitz T, Breyer WA, Glasfeld A. 2015. Interactions of the Metalloregulatory  
669 Protein SloR from *Streptococcus mutans* with Its Metal Ion Effectors and DNA Binding Site.  
670 *J Bacteriol* 197:3601–3615.
- 671 23. Haswell JR, Pruitt BW, Cornacchione LP, Coe CL, Smith EG, Spatafora GA. 2013.  
672 Characterization of the Functional Domains of the SloR Metalloregulatory Protein in  
673 *Streptococcus mutans*. *J Bacteriol* 195:126–134.
- 674 24. O’Rourke KP, Shaw JD, Pesesky MW, Cook BT, Roberts SM, Bond JP, Spatafora GA.  
675 2010. Genome-Wide Characterization of the SloR Metalloregulome in *Streptococcus*  
676 *mutans*. *J Bacteriol* 192:1433–1443.

- 677 25. Dunning DW, McCall LW, Powell WF, Arscott WT, McConocha EM, McClurg CJ,  
678 Goodman SD, Spatafora GA. 2008. SloR modulation of the *Streptococcus mutans* acid  
679 tolerance response involves the GcrR response regulator as an essential intermediary.  
680 *Microbiology* 154:1132–1143.
- 681 26. Ajdić D, McShan WM, McLaughlin RE, Savić G, Chang J, Carson MB, Primeaux C, Tian  
682 R, Kenton S, Jia H, Lin S, Qian Y, Li S, Zhu H, Najjar F, Lai H, White J, Roe BA, Ferretti JJ.  
683 2002. Genome sequence of *Streptococcus mutans* UA159, a cariogenic dental pathogen. *Proc*  
684 *Natl Acad Sci U S A* 99:14434–14439.
- 685 27. Xie Z, Okinaga T, Qi F, Zhang Z, Merritt J. 2011. Cloning-Independent and  
686 Counterselectable Markerless Mutagenesis System in *Streptococcus mutans*. *Appl Environ*  
687 *Microbiol* 77:8025–8033.
- 688 28. Sambrook J, Russell DW. 2006. Purification of Nucleic Acids by Extraction with  
689 Phenol:Chloroform. *Cold Spring Harb Protoc* 2006:pdb.prot4455.
- 690 29. Idone V, Brendtro S, Gillespie R, Kocaj S, Peterson E, Rendi M, Warren W, Michalek S,  
691 Krastel K, Cvitkovitch D, Spatafora G. 2003. Effect of an Orphan Response Regulator on  
692 *Streptococcus mutans* Sucrose-Dependent Adherence and Cariogenesis. *Infect Immun*  
693 71:4351–4360.
- 694 30. 2017. *Streptococcus mutans* UA159 chromosome, complete genome.
- 695 31. Chong P, Chattoraj P, Biswas I. 2010. Activation of the SMU.1882 Transcription by CovR  
696 in *Streptococcus mutans*. *PLoS ONE* 5.

- 697 32. Spatafora G, Moore M, Landgren S, Stonehouse E, Michalek S. 2001. Expression of  
698 *Streptococcus mutans* *fimA* is iron-responsive and regulated by a DtxR homologue.  
699 *Microbiology* 147:1599–1610.
- 700 33. Fenno JC, Shaikh A, Spatafora G, Fives-Taylor P. 1995. The *fimA* locus of *Streptococcus*  
701 *parasanguis* encodes an ATP-binding membrane transport system. *Mol Microbiol* 15:849–  
702 863.
- 703 34. Stoll KE, Draper WE, Kliegman JI, Golynskiy MV, Brew-Appiah RAT, Phillips RK, Brown  
704 HK, Breyer WA, Jakubovics NS, Jenkinson HF, Brennan RG, Cohen SM, Glasfeld A. 2009.  
705 Characterization and structure of the manganese-responsive transcriptional regulator ScaR.  
706 *Biochemistry (Mosc)* 48:10308–10320.
- 707 35. Meysman P, Collado-Vides J, Morett E, Viola R, Engelen K, Laukens K. 2014. Structural  
708 Properties of Prokaryotic Promoter Regions Correlate with Functional Features. *PLOS ONE*  
709 9:e88717.
- 710 36. Szoke PA, Allen TL, deHaseth PL. 1987. Promoter recognition by *Escherichia coli* RNA  
711 polymerase: effects of base substitutions in the -10 and -35 regions. *Biochemistry (Mosc)*  
712 26:6188–6194.
- 713 37. Bashyam MD, Tyagi AK. 1998. Identification and Analysis of “Extended -10” Promoters  
714 from *Mycobacteria*. *J Bacteriol* 180:2568–2573.
- 715 38. Mitchell JE, Zheng D, Busby SJW, Minchin SD. 2003. Identification and analysis of  
716 ‘extended -10’ promoters in *Escherichia coli*. *Nucleic Acids Res* 31:4689–4695.

717 39. van Hijum SAFT, Medema MH, Kuipers OP. 2009. Mechanisms and Evolution of Control  
718 Logic in Prokaryotic Transcriptional Regulation. *Microbiol Mol Biol Rev* MMBR 73:481–  
719 509.

720 40. Goodsell DS, Dickerson RE. 1994. Bending and curvature calculations in B-DNA. *Nucleic*  
721 *Acids Res* 22:5497–5503.

722 41. Que Q, Helmann JD. 2000. Manganese homeostasis in *Bacillus subtilis* is regulated by  
723 MntR, a bifunctional regulator related to the diphtheria toxin repressor family of proteins.  
724 *Mol Microbiol* 35:1454–1468.

725

726

727

728 **Tables & Figures**

729

730 **Table 1. Bacterial strains used in this study.**

731

732 **Table 2. Fold change in expression for *S. mutans sloABCR*.**

733 \*Student's t-test,  $p < 0.05$ ; \*\*Student's t-test,  $p < 0.0001$ ; #Student's t-test,  $p < 0.05$

734 **Figure 1. SloR-SRE binding model in the region of the *sloABC* promoter.** Shown are each of  
735 three inverted hexameric repeats (in blue, purple, and red) that span 72bp in the *sloABC* promoter  
736 region, and to which SloR presumably binds as three homodimers. Affinity binding studies support  
737 preferential binding of SloR homodimers to the hexameric repeat in region B (designated by the  
738 black bar), followed by cooperative binding of SloR dimers to regions A and C. Inset: Negative  
739 staining of the SloR-SRE interaction *in vitro* supports homodimeric binding of SloR to a 72bp  
740 SloR recognition element (SRE). Shown are three SloR homodimers bound to a DNA filament  
741 containing the 72bp SloR binding element. The arrowheads denote the center of mass for each  
742 SloR homodimer.

743



744 **Figure 2. Shown is the intergenic region between the *sloR* and *sloC* genes which harbors a**  
745 **recognizable promoter.** The nucleotide sequence of this region was aligned with the *S. mutans*  
746 UA159 genome from the NCBI GenBank Database (RefSeq accession number NC\_004350.2).  
747 The +1 transcription start site (designated by the arrow) marks the transcription start site of the  
748 *sloR* gene as defined by 5'RACE, and defines a 19bp 5' untranslated region (UTR). Also shown  
749 are the predicted -35 and -10 promoter regions, the predicted ribosome binding site (RBS), and the  
750 start codon (SC) of the 654bp *sloR* gene. A putative extended -10 element is denoted by the dashed  
751 line.

752 **Figure 3. The *S. mutans sloR* gene is transcribed even in the absence of a functional *sloABC***  
753 **promoter. a.)** Map of the *sloABCR* operon and location of primer annealing sites. Primer P1  
754 (*sloA*.RT\_PCR.F) anneals within the *sloA* coding sequence, and primers P2 and P3  
755 (*sloR*.RT\_PCR.F and *sloR*.RT\_PCR.R, respectively) anneal within the *sloR* coding sequence. **b.)**  
756 Products of reverse transcriptase PCR resolved on a 0.8% agarose gel. Amplification of cDNA  
757 with the P1/P3 primer pair generated a 2745bp amplicon in UA159 but not in GMS611 or  
758 GMS611d, consistent with disruption of the *sloABC* promoter in the mutant strains. In contrast,  
759 cDNA amplification with the P2/P3 primer pair gave rise to a 250bp amplicon even in the *sloABC*  
760 promoter mutants GMS611 and GMS611d, indicating the presence of a *sloR*-specific promoter in  
761 the 184bp intergenic region that separates the *sloABC* operon from the downstream *sloR* gene  
762 (gDNA = genomic DNA; cDNA = copy DNA).

763 **Figure 4. SloR binds directly to the intergenic region (IGR) between the *S. mutans sloC* and**  
764 ***sloR* genes. a.)** Shown are the results of EMSA which support direct SloR binding to 204bp and  
765 155bp fragments of the *sloC-sloR* intergenic region at protein concentrations as low as 400nM.  
766 SloR binding to a 95bp IGR derivative was relatively compromised however, and completely  
767 absent when a 62bp deletion derivative was used as the binding template. A 205bp amplicon that  
768 includes the *sloABC* promoter was used as a positive control for SloR binding. EDTA was added  
769 to select reaction mixtures in an attempt to abrogate metal ion-dependent binding. 12% non-  
770 denaturing polyacrylamide gels were run at 300 volts for 1.5 hours. Film exposure in the presence  
771 of an intensifying screen proceeded for 48 hours at -80°C before development. **b.)** SloR binding  
772 to serial deletion fragments of the *S. mutans* IGR. The arrowheads facing inward represent  
773 AATTAA hexameric repeats to which SloR putatively binds. The vertical red bars denote the  
774 positioning of the -10 and -35 promoter sequences of the *sloR*-specific promoter. Whether or not  
775 SloR binds to the IGR fragment is shown with a (+) or (-) designation.

776 **Figure 5. The results of *sloABCR* transcription experiments performed *in vitro* (IVT) support**  
777 **SloR as a bifunctional regulator.** Transcription of the *sloABC* and *sloR* genes was quantified  
778 using ImageJ software. SloR (75nM) was added to select reaction mixtures containing RNase  
779 inhibitor and either *sloA* or *sloR* template DNA. Pixel counting was performed with ImageJ  
780 software and does not include unincorporated  $\alpha^{32}\text{P}$ -UTP. Higher pixel counts indicate greater band  
781 intensity. Shown are the results of a single representative experiment (from a total of 3  
782 independent experiments) which support repression of *sloA* and activation of *sloR* transcription by  
783 the SloR metalloregulator.

1 **Tables**

2

3 **Table 1. Bacterial strains used in this study.**

| Strain                       | Description / Relevant Characteristics                                                                                | Source                                 |
|------------------------------|-----------------------------------------------------------------------------------------------------------------------|----------------------------------------|
| <i>E. coli</i><br>BL21 (DE3) | <i>hA2 [lon] ompT gal(λ) (DE3) [dcm] ΔhsdS</i>                                                                        | Thermo Fisher<br>Scientific            |
| <i>S. mutans</i><br>UA159    | Wild-type <i>S. mutans</i> ,<br>Serotype <i>c</i>                                                                     | ATCC 700610                            |
| <i>S. mutans</i><br>GMS602   | UA159 derived, contains IFDC2 cassette in<br>the <i>sloA</i> promoter region, Em <sup>r</sup> , 4-Cl-Phe <sup>s</sup> | Spatafora <i>et al.</i> (2015)<br>(22) |
| <i>S. mutans</i><br>GMS611   | Contains a markerless T→C mutation<br>within the -35 region of the <i>sloABC</i><br>promoter                          | This study                             |
| <i>S. mutans</i><br>GMS611d  | Contains a markerless T→C mutation<br>within the -10 region of the <i>sloABC</i><br>promoter                          | This study                             |

4

5

6

7

8

9

10 **Table 2. Fold change in expression for *S. mutans sloABCR*.**

| Strain/Condition |                                          |                                        |                              |                              |                              |
|------------------|------------------------------------------|----------------------------------------|------------------------------|------------------------------|------------------------------|
| Locus            | UA159<br>(125 $\mu$ M Mn <sup>2+</sup> ) | UA159<br>(5 $\mu$ M Mn <sup>2+</sup> ) | UA159                        | GMS611                       | GMS611d                      |
| <i>sloABC</i>    | 0.33 $\pm$ 0.03*                         | 1.02 $\pm$ 0.09*                       | 1.35 $\pm$ 0.10**            | 0.14 $\pm$ 0.01**            | 0.05 $\pm$ 0.00**            |
| <i>sloR</i>      | 0.75 $\pm$ 0.09                          | 1.02 $\pm$ 0.19                        | 1.35 $\pm$ 0.14 <sup>#</sup> | 0.96 $\pm$ 0.03 <sup>#</sup> | 0.81 $\pm$ 0.10 <sup>#</sup> |

11 \* Student's t-test, p<0.05; \*\*Student's t-test, p< 0.0001; <sup>#</sup> Student's t-test, p<0.05

1 **Figures**

2

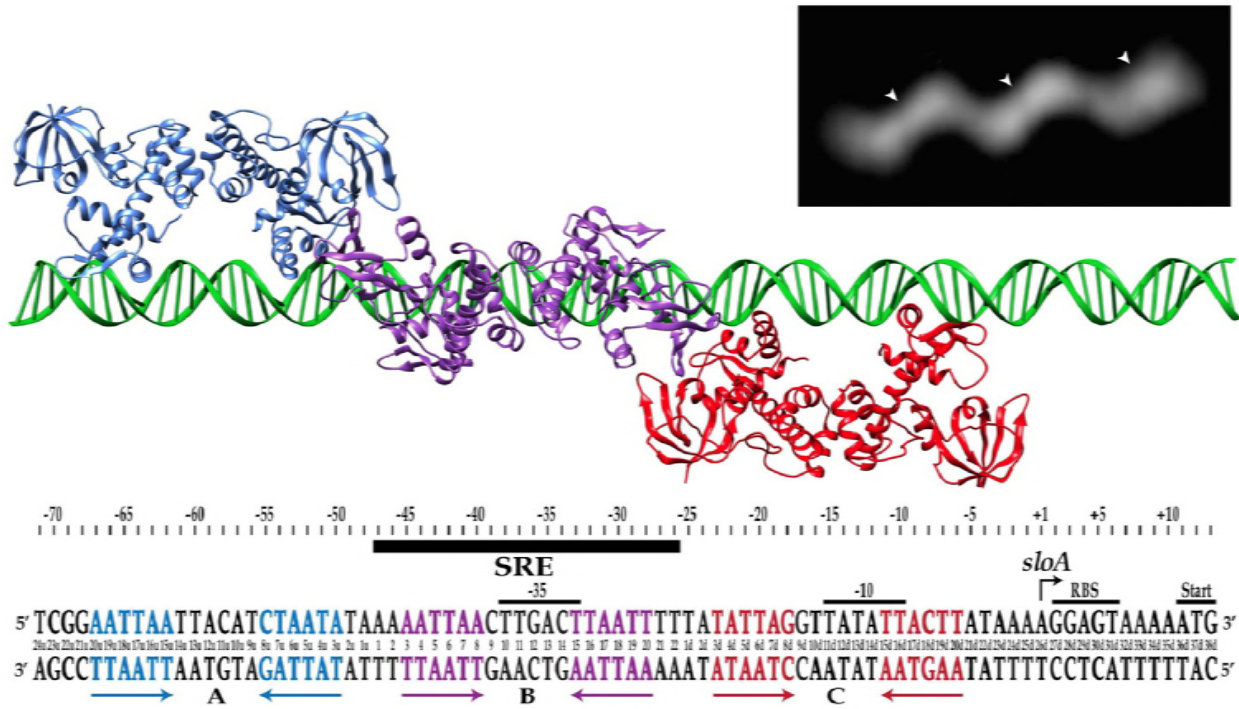

4 **Figure 1. SloR-SRE binding model in the region of the *sloABC* promoter.** Shown are each of  
5 three inverted hexameric repeats (in blue, purple, and red) that span 72bp in the *sloABC* promoter  
6 region, and to which SloR presumably binds as three homodimers. Affinity binding studies support  
7 preferential binding of SloR homodimers to the hexameric repeat in region B (designated by the  
8 black bar), followed by cooperative binding of SloR dimers to regions A and C. Inset: Negative  
9 staining of the SloR-SRE interaction *in vitro* supports homodimeric binding of SloR to a 72bp  
10 SloR recognition element (SRE). Shown are three SloR homodimers bound to a DNA filament  
11 containing the 72bp SloR binding element. The arrowheads denote the center of mass for each  
12 SloR homodimer.

14

```
gataattaaaacttttatccactttttactgacattttgatataatgattttgacaaagaagaggataaaactatgacac
ctaataaagaagattacccttaaaattatttatgaactcagtgaaacgtgatgagaagatcagcaacaagcaaattgct
gagaaaatgtctgtatctgctcc
```

14

15 **Figure 2. Shown is the intergenic region between the *sloR* and *sloC* genes which harbors a**  
16 **recognizable promoter.** The nucleotide sequence of this region was aligned with the *S. mutans*  
17 UA159 genome from the NCBI GenBank Database (RefSeq accession number NC\_004350.2).  
18 The +1 transcription start site (designated by the arrow) marks the transcription start site of the  
19 *sloR* gene as defined by 5'RACE, and defines a 19bp 5' untranslated region (UTR). Also shown  
20 are the predicted -35 and -10 promoter regions, the predicted ribosome binding site (RBS), and the  
21 start codon (SC) of the 654bp *sloR* gene. A putative extended -10 element is denoted by the dashed  
22 line.

23

24



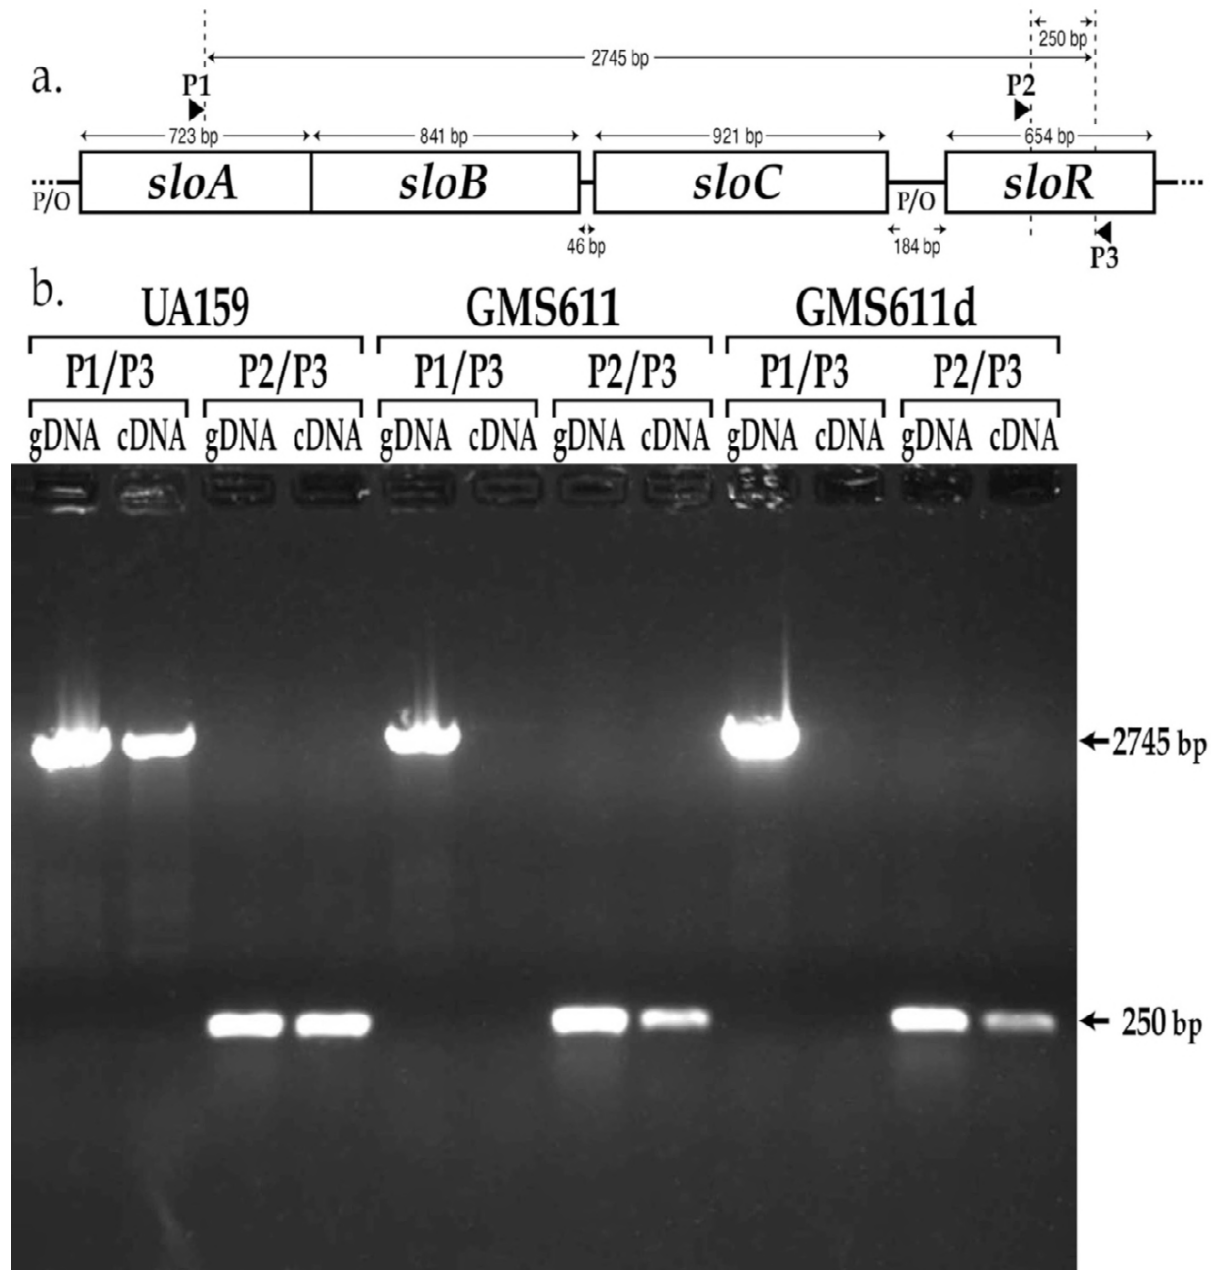

25

26 **Figure 3. The *S. mutans sloR* gene is transcribed even in the absence of a functional *sloABC***  
27 **promoter. a.)** Map of the *sloABC*R operon and location of primer annealing sites. Primer P1  
28 (*sloA*.RT\_PCR.F) anneals within the *sloA* coding sequence, and primers P2 and P3  
29 (*sloR*.RT\_PCR.F and *sloR*.RT\_PCR.R, respectively) anneal within the *sloR* coding sequence. **b.)**  
30 Products of reverse transcriptase PCR resolved on a 0.8% agarose gel. Amplification of cDNA

31 with the P1/P3 primer pair generated a 2745bp amplicon in UA159 but not in GMS611 or  
32 GMS611d, consistent with disruption of the *sloABC* promoter in the mutant strains. In contrast,  
33 cDNA amplification with the P2/P3 primer pair gave rise to a 250bp amplicon even in the *sloABC*  
34 promoter mutants GMS611 and GMS611d, indicating the presence of a *sloR*-specific promoter in  
35 the 184bp intergenic region that separates the *sloABC* operon from the downstream *sloR* gene  
36 (gDNA = genomic DNA; cDNA = copy DNA).

37

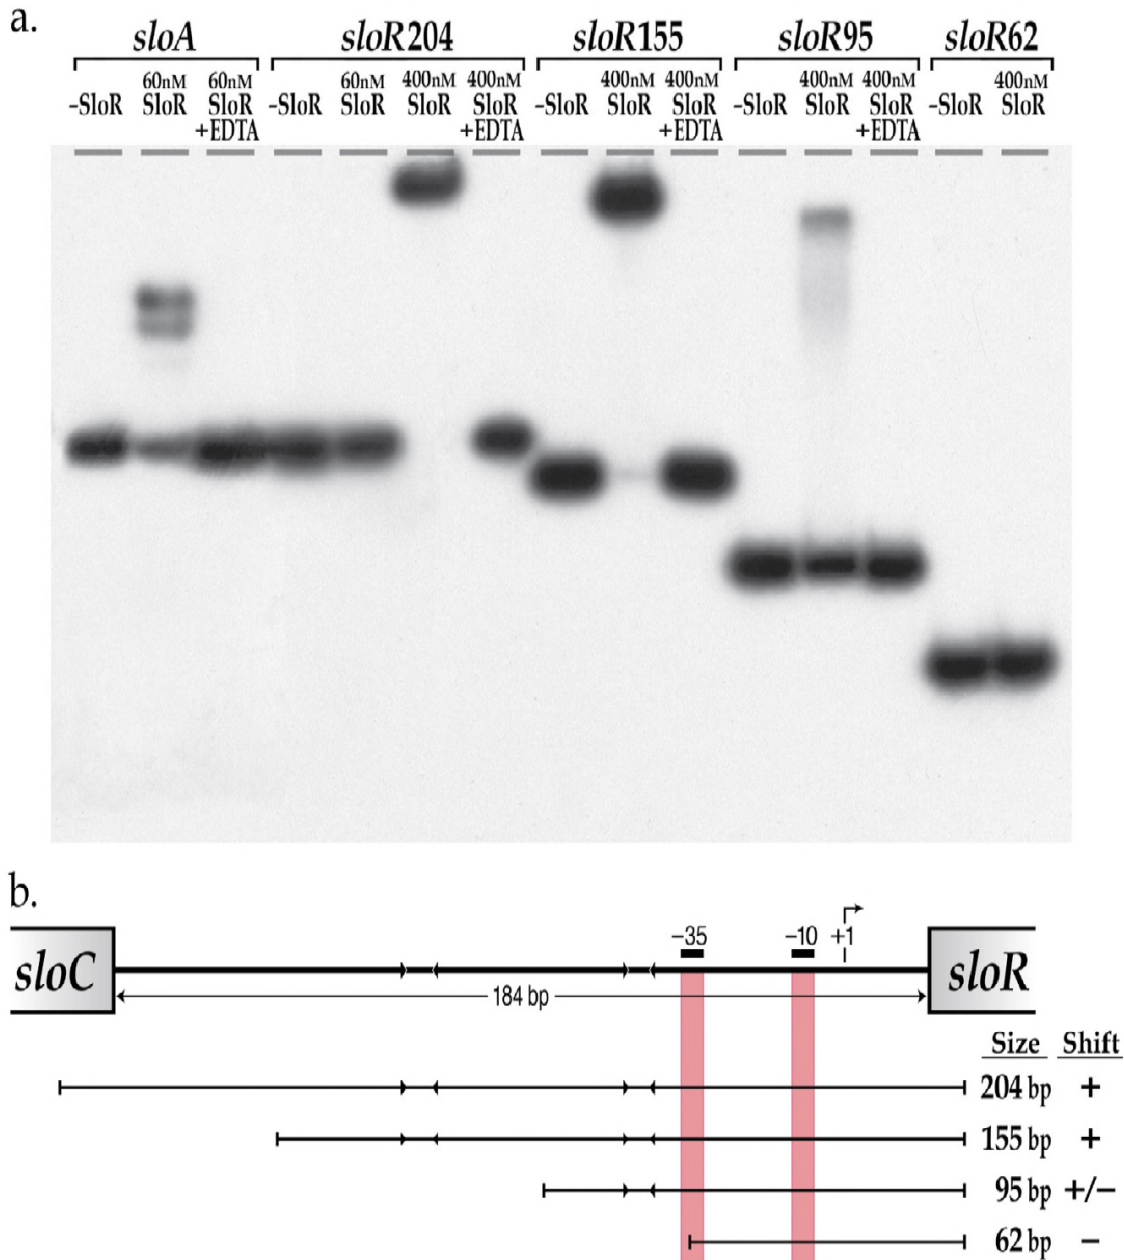

38

39 **Figure 4. SloR binds directly to the intergenic region (IGR) between the *S. mutans* *sloC* and**  
 40 ***sloR* genes. a.)** Shown are the results of EMSA which support direct SloR binding to 204bp and  
 41 155bp fragments of the *sloC-sloR* intergenic region at protein concentrations as low as 400nM.  
 42 SloR binding to a 95bp IGR derivative was relatively compromised however, and completely  
 43 absent when a 62bp deletion derivative was used as the binding template. A 205bp amplicon that

44 includes the *sloABC* promoter was used as a positive control for SloR binding. EDTA was added  
45 to select reaction mixtures in an attempt to abrogate metal ion-dependent binding. 12% non-  
46 denaturing polyacrylamide gels were run at 300 volts for 1.5 hours. Film exposure in the presence  
47 of an intensifying screen proceeded for 48 hours at -80°C before development. **b.)** SloR binding  
48 to serial deletion fragments of the *S. mutans* IGR. The arrowheads facing inward represent  
49 AATTAA hexameric repeats to which SloR putatively binds. The vertical red bars denote the  
50 positioning of the -10 and -35 promoter sequences of the *sloR*-specific promoter. Whether or not  
51 SloR binds to the IGR fragment is shown with a (+) or (-) designation.

52

53

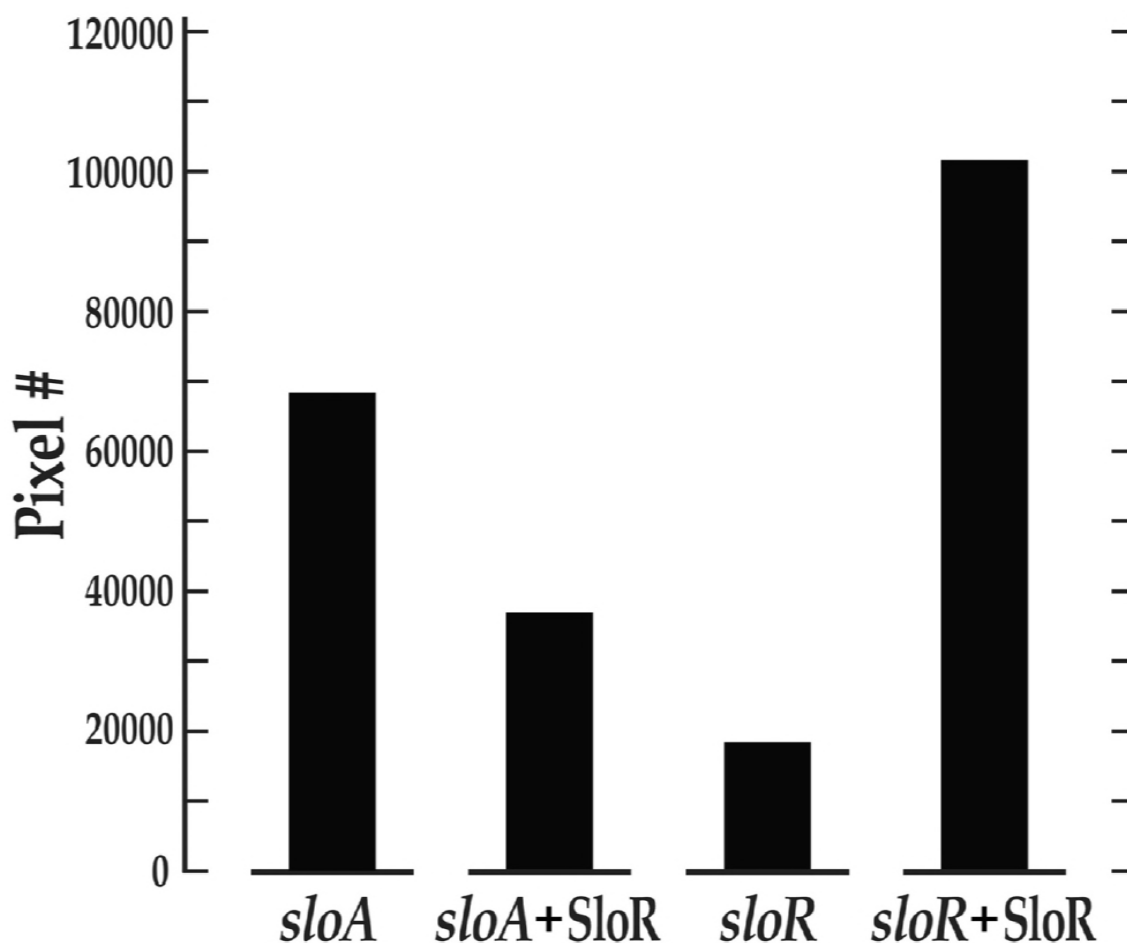

54

55 **Figure 5. The results of *sloABC* transcription experiments performed *in vitro* (IVT) support**  
56 **SloR as a bifunctional regulator.** Transcription of the *sloABC* and *sloR* genes was quantified  
57 using ImageJ software. SloR (75nM) was added to select reaction mixtures containing RNase  
58 inhibitor and either *sloA* or *sloR* template DNA. Pixel counting was performed with ImageJ  
59 software and does not include unincorporated  $\alpha^{32}\text{P}$ -UTP. Higher pixel counts indicate greater band  
60 intensity. Shown are the results of a single representative experiment (from a total of 3  
61 independent experiments) which support repression of *sloA* and activation of *sloR* transcription by  
62 the SloR metalloregulator.
